# Supplementary material
Source: HighWire-hosted journal article supplement (https://bmjopenquality.bmj.com/highwire/filestream/141765/field_highwire_adjunct_files/5/bmjoq-2020-001147supp006_data_supplement.pdf)
Supplement: bmjoq-2020-001147supp006_data_supplement.pdf [file bmjoq-2020-001147supp006_data_supplement.pdf]

## Supplementary File 6

## QIKAT-R mean clinician scores pre-and post-collaborative by subgroup

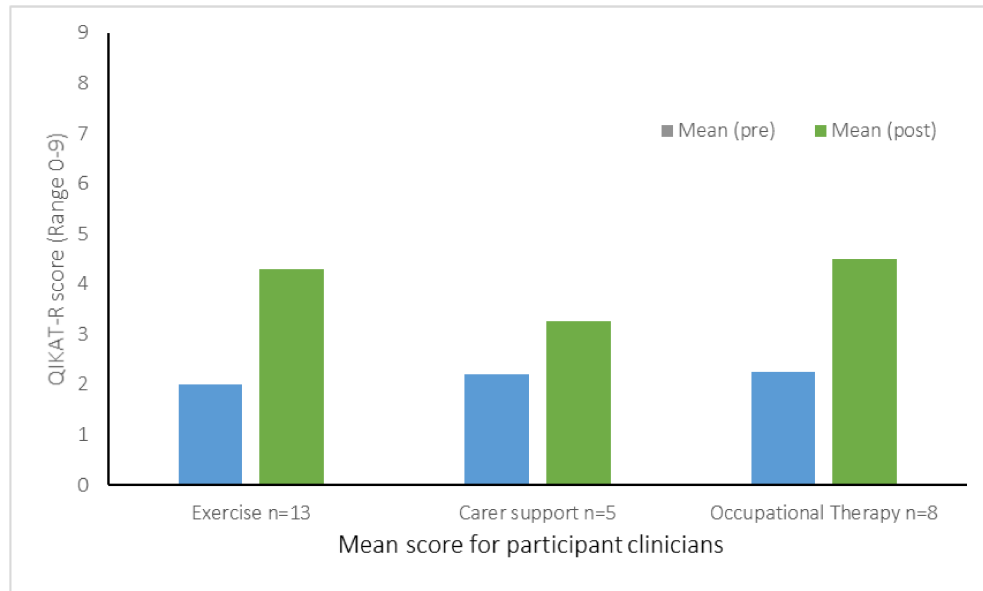

Figure 1. QIKAT-R mean clinician scores pre-and post-collaborative by subgroup
